# Supplementary material for: Mutant Selecting According to the Nondominated Original Statements
Source: Hindawi journal article supplement (doi:10.1155/2019/4702345), 2019-11-03
Supplement: f1 [file 4702345.f1.xls]

## Sheet: LUDecomposition.java
							after reduction
	statements	equivalent	mutant	Test Cases	killed	Effective	mutants	killed	test cases	killed	equivalent	statements		non-dominated	statements	sampled	killed	test	killed
LUDecomposition(org.apache.commons.math3.linear.RealMatrix,double)	46		289				59					46		7	46	57
org.apache.commons.math3.linear.RealMatrix_getL()	9		56				12					9		1	9	12
org.apache.commons.math3.linear.RealMatrix_getP()	7		44				12					7		1	7	12
org.apache.commons.math3.linear.RealVector_solve(org.apache.commons.math3.linear.RealVector)	19		138				41					19		5	19	40
org.apache.commons.math3.linear.RealMatrix_solve(org.apache.commons.math3.linear.RealMatrix)	30		191				37					30		6	30	36
	111	22	718	15	692	15	161	156	4	692	4	111		20	111	157	153	4	688

## Sheet: BiDiagonalTransformer.java
							after reduction
	statements	equivalent	mutant	Test Cases	killed	Effective	mutants	killed	test cases	killed	equivalent	statements		non-dominated	statements	sampled	killed	test	killed
org.apache.commons.math3.linear.RealMatrix_getB()	12		79				28							2	12
org.apache.commons.math3.linear.RealMatrix_getU()	24		203				52							4	24
org.apache.commons.math3.linear.RealMatrix_getV()	24		176				34							4	24
void_transformToLowerBiDiagonal()	39		317				81							6	39
void_transformToUpperBiDiagonal()	39		319				62							6	39
	138	28	1094	20	1064	16	257	252	6	1056	5			22	138	252	248	5	1034

## Sheet: CholeskyDecomposition.java
							after reduction
	statements	equivalent	mutant	Test Cases	killed	Effective	mutants	killed	test cases	killed	equivalent	statements		non-dominated	statements	sampled	killed	test	killed
CholeskyDecomposition(org.apache.commons.math3.linear.RealMatrix,double,double)			165
	27	12	165		149	5	40	33	3	147	6	4		4		34	31	3	138

## Sheet: MatirxUitls
							after reduction
	statements	equivalent	mutant	Test Cases	killed	Effective	mutants	killed	test cases	killed	equivalent	statements		non-dominated	statements	sampled	killed	test	killed
org.apache.commons.math3.linear.RealMatrix_blockInverse(org.apache.commons.math3.linear.RealMatrix,int)	37		83				14							5
void_solveLowerTriangularSystem(org.apache.commons.math3.linear.RealMatrix,org.apache.commons.math3.linear.RealVector)	17		118				35							4
void_solveUpperTriangularSystem(org.apache.commons.math3.linear.RealMatrix,org.apache.commons.math3.linear.RealVector)	17		118				30							4
	71	12	319	19	306	16	79	75	14	282	4			13		75	63	13	268

## Sheet: RectangularCholeskyDecompositio
							after reduction
	statements	equivalent	mutant	Test Cases	killed	Effective	mutants	killed	test cases	killed	equivalent	statements		non-dominated	statements	sampled	killed	test	killed
	71	39	391	9	344	7	56	52	5	339	14			7		42	41	3	334
							after reduction

## Sheet: SchurTransformer
							after reduction
	statements	equivalent	mutant	Test Cases	killed	Effective	mutants	killed	test cases	killed	equivalent	statements		non-dominated	statements	sampled	killed	test	killed
int_findSmallSubDiagonalElement(int,double)	8	8	82				26	23			2	2		2		24
int_initQRStep(int,int,org.apache.commons.math3.linear.SchurTransformer.ShiftInfo,double)	17	21	254				30	24			3	2		2		27
void_performDoubleQRStep(int,int,int,org.apache.commons.math3.linear.SchurTransformer.ShiftInfo,double)	53	27	827				54	46			6	8		8		48
void_transform()	44	54	672				82	59			13	7		7		69
	122	110	1835		1709	13	192	152	8	1659	24	19		19		168	147	4	1602

## Sheet: TriDiagonalTransformer
							after reduction
	statements	equivalent	mutant	Test Cases	killed	Effective	mutants	killed	test cases	killed	equivalent	statements		non-dominated	statements	sampled	killed	test	killed
org.apache.commons.math3.linear.RealMatrix_getQT()	25		216				71	71						3		71
org.apache.commons.math3.linear.RealMatrix_getT()	11		74				28	28						2		28
void_transform()	37		341				87	87						5		87
	73	7	631	13	622	13	186	186	1	622	0	0		10		186	185	1	618

## Sheet: SUMMARY
							after reduction
	statements	equivalent	mutant	Test Cases	killed	Effective	mutants	killed	test cases	killed	equivalent	statements		non-dominated	statements	sampled	killed	test	killed
1	111	22	718	15	692	15	161	156	4	692	4	111		20	111	157	153	4	688
2	138	28	1094	20	1064	16	257	252	6	1056	5			22	138	252	248	5	1034
3	27	12	165	25	149	5	40	33	3	147	6	4		4		34	31	3	138
4	71	12	319	19	306	16	79	75	14	282	4			13		75	63	13	268
5	71	39	391	9	344	7	56	52	5	339	14			7		42	41	3	334
6	122	110	1835	28	1709	13	192	152	8	1659	24	19		19		168	147	4	1602
7	73	7	631	13	622	7	186	186	1	622	0	0		10		186	185	1	618
	613	230	5153	129	4886	79	971	906	41	4797	57	134	0	95		914	868	33	4682
